# Supplementary material for: Cardiovascular Biomarker Profiles in Obesity and Relation to Normalization of Subclinical Cardiac Dysfunction after Bariatric Surgery
Source: MDPI journal article supplement (doi:10.3390/cells11030422), 2022-01-26
Supplement: s1 [file s1]

**Supplementary Table S1:** List of abbreviations of all 92 biomarkers

| <b>Abbreviation</b>  | <b>Full name</b>                                |
|----------------------|-------------------------------------------------|
| <b>AP-N</b>          | Aminopeptidase N                                |
| <b>AZU</b>           | Azurocidin                                      |
| <b>BLM hydrolase</b> | Bleomycin hydrolase                             |
| <b>CCL15</b>         | C-C motif chemokine 15                          |
| <b>CCL16</b>         | C-C motif chemokine 16                          |
| <b>CCL24</b>         | C-C motif chemokine 24                          |
| <b>CXCL16</b>        | C-X-C motif chemokine 16                        |
| <b>CDH5</b>          | Cadherin-5                                      |
| <b>CPA1</b>          | Carboxypeptidase A1                             |
| <b>CPB1</b>          | Carboxypeptidase B                              |
| <b>CASP-3</b>        | Caspase-3                                       |
| <b>CTSD</b>          | Cathepsin D                                     |
| <b>CTSZ</b>          | Cathepsin Z                                     |
| <b>ALCAM</b>         | CD166 antigen                                   |
| <b>CHI3L1</b>        | Chitinase-3-like protein 1                      |
| <b>CHIT1</b>         | Chitotriosidase-1                               |
| <b>COL1A1</b>        | Collagen alpha-1(I) chain                       |
| <b>CD93</b>          | Complement component C1q receptor               |
| <b>CNTN1</b>         | Contactin-1                                     |
| <b>CSTB</b>          | Cystatin-B                                      |
| <b>SELE</b>          | E-selectin                                      |
| <b>PI3</b>           | Elafin                                          |
| <b>EPHB4</b>         | Ephrin type-B receptor 4                        |
| <b>EGFR</b>          | Epidermal growth factor receptor                |
| <b>Ep-CAM</b>        | Epithelial cell adhesion molecule               |
| <b>FABP4</b>         | Fatty acid-binding protein, adipocyte           |
| <b>Gal-3</b>         | Galectin-3                                      |
| <b>Gal-4</b>         | Galectin-4                                      |
| <b>GRN</b>           | Granulins                                       |
| <b>GDF-15</b>        | Growth/differentiation factor 15                |
| <b>IGFBP-1</b>       | Insulin-like growth factor-binding protein 1    |
| <b>IGFBP-2</b>       | Insulin-like growth factor-binding protein 2    |
| <b>IGFBP-7</b>       | Insulin-like growth factor-binding protein 7    |
| <b>ITGB2</b>         | Integrin beta-2                                 |
| <b>ICAM-2</b>        | Intercellular adhesion molecule 2               |
| <b>IL-1RT1</b>       | Interleukin-1 receptor type 1                   |
| <b>IL-1RT2</b>       | Interleukin-1 receptor type 2                   |
| <b>IL-17RA</b>       | Interleukin-17 receptor A                       |
| <b>IL-18BP</b>       | Interleukin-18-binding protein                  |
| <b>IL2-RA</b>        | Interleukin-2 receptor subunit alpha            |
| <b>IL-6RA</b>        | Interleukin-6 receptor subunit alpha            |
| <b>JAM-A</b>         | Junctional adhesion molecule A                  |
| <b>KLK6</b>          | Kallikrein-6                                    |
| <b>LDL receptor</b>  | Low-density lipoprotein receptor                |
| <b>LTBR</b>          | Lymphotoxin-beta receptor                       |
| <b>MEPE</b>          | Matrix extracellular phosphoglycoprotein        |
| <b>MMP-2</b>         | Matrix metalloproteinase-2                      |
| <b>MMP-3</b>         | Matrix metalloproteinase-3                      |
| <b>MMP-9</b>         | Matrix metalloproteinase-9                      |
| <b>TIMP4</b>         | Metalloproteinase inhibitor 4                   |
| <b>MCP-1</b>         | Monocyte chemotactic protein 1                  |
| <b>PRTN3</b>         | Myeloblastin                                    |
| <b>MPO</b>           | Myeloperoxidase                                 |
| <b>MB</b>            | Myoglobin                                       |
| <b>NT-proBNP</b>     | N-terminal prohormone brain natriuretic peptide |
| <b>Notch 3</b>       | Neurogenic locus notch homolog protein 3        |

|                       |                                                            |
|-----------------------|------------------------------------------------------------|
| <b>OPN</b>            | Osteopontin                                                |
| <b>OPG</b>            | Osteoprotegerin                                            |
| <b>SELP</b>           | P-selectin                                                 |
| <b>PON3</b>           | Paraoxonase                                                |
| <b>PGLYRP1</b>        | Peptidoglycan recognition protein 1                        |
| <b>PLC</b>            | Perlecan                                                   |
| <b>PAI</b>            | Plasminogen activator inhibitor 1                          |
| <b>PECAM-1</b>        | Platelet endothelial cell adhesion molecule                |
| <b>GP6</b>            | Platelet glycoprotein VI                                   |
| <b>PDGF subunit A</b> | Platelet-derived growth factor subunit A                   |
| <b>PCSK9</b>          | Proprotein convertase subtilisin/kexin type 9              |
| <b>DLK-1</b>          | Protein delta homolog 1                                    |
| <b>PSP-D</b>          | Pulmonary surfactant-associated protein D                  |
| <b>RETN</b>           | Resistin                                                   |
| <b>RARRES2</b>        | Retinoic acid receptor responder protein 2                 |
| <b>CD163</b>          | Scavenger receptor cysteine-rich type 1 protein M130       |
| <b>SCGB3A2</b>        | Secretoglobin family 3A member 2                           |
| <b>SPON1</b>          | Spondin-1                                                  |
| <b>ST2</b>            | ST2 protein                                                |
| <b>TR-AP</b>          | Tartrate-resistant acid phosphatase type 5                 |
| <b>TFPI</b>           | Tissue factor pathway inhibitor                            |
| <b>t-PA</b>           | Tissue-type plasminogen activator                          |
| <b>TR</b>             | Transferrin receptor protein 1                             |
| <b>TFF3</b>           | Trefoil factor 3                                           |
| <b>TLT-2</b>          | Trem-like transcript 2 protein                             |
| <b>TNFSF13B</b>       | Tumor necrosis factor ligand superfamily member 13B        |
| <b>TNF-R1</b>         | Tumor necrosis factor receptor 1                           |
| <b>TNF-R2</b>         | Tumor necrosis factor receptor 2                           |
| <b>TNFRSF10C</b>      | Tumor necrosis factor receptor superfamily member 10C      |
| <b>TNFRSF14</b>       | Tumor necrosis factor receptor superfamily member 14       |
| <b>FAS</b>            | Tumor necrosis factor receptor superfamily member 6        |
| <b>AXL</b>            | Tyrosine-protein kinase receptor UFO                       |
| <b>SHPS-1</b>         | Tyrosine-protein phosphatase non-receptor type substrate 1 |
| <b>U-PAR</b>          | Urokinase plasminogen activator surface receptor           |
| <b>uPA</b>            | Urokinase-type plasminogen activator                       |
| <b>vWF</b>            | von Willebrand factor                                      |

---

**Supplementary Table S2: Comparison of all biomarkers pre- and post-bariatric surgery**

| Abbreviation  | Pre-surgery (n=72) | Post-surgery (n=72) | Relative changes | p-value |
|---------------|--------------------|---------------------|------------------|---------|
| AP-N          | 36.6 [33.1-41.8]   | 37.4 [33.3-42.3]    | 2.2%             | 0.27    |
| AZU           | 6.1 [5.0-8.0]      | 5.3 [4.6-6.5]       | -13.1%           | <0.001* |
| BLM hydrolase | 8.0 [6.7-9.5]      | 6.7 [5.4-7.8]       | -16.3%           | <0.001* |
| CCL15         | 117 [103-154]      | 135 [115-172]       | 15.3%            | 0.75    |
| CCL16         | 126 [91-158]       | 119 [92-147]        | -5.6%            | <0.001* |
| CCL24         | 40.9 [24.4-67.5]   | 40.8 [26.4-69.0]    | -0.2%            | 0.75    |
| CXCL16        | 48.2 [43.2-55.9]   | 43.0 [38.8-49.9]    | -10.8%           | <0.001* |
| CDH5          | 26.1 [22.0-29.7]   | 21.8 [18.9-25.9]    | -16.5%           | <0.001* |
| CPA1          | 74.1 [51.3-96.8]   | 70.7 [53.3-102.6]   | -4.6%            | 0.92    |
| CPB1          | 65.5 [45.4-87.2]   | 63.2 [49.0-89.8]    | -3.5%            | 0.26    |
| CASP-3        | 529 [335-751]      | 336 [198-532]       | -36.5%           | <0.001* |
| CTSD          | 6.5 [5.5-8.4]      | 5.5 [4.7-6.7]       | -15.4%           | <0.001* |
| CTSZ          | 50.9 [42.6-63.5]   | 47.2 [42.6-53.5]    | -7.3%            | <0.001* |
| ALCAM         | 224 [205-251]      | 207 [181-228]       | -7.6%            | <0.001* |
| CHI3L1        | 17.3 [11.9-26.1]   | 18.0 [11.3-26.9]    | 4.0%             | 0.49    |
| CHIT1         | 29.7 [19.4-40.3]   | 28.8 [19.3-44.8]    | -3.0%            | 0.15    |
| COL1A1        | 8.6 [7.2-10.1]     | 11.7 [9.8-13.3]     | 36.0%            | <0.001* |
| CD93          | 2349 [2074-2722]   | 2239 [1842-2415]    | -4.7%            | 0.001*  |
| CNTN1         | 29.3 [24.9-34.3]   | 31.6 [26.1-36.1]    | 7.8%             | <0.001* |
| CSTB          | 21.1 [16.1-28.6]   | 18.3 [14.1-21.2]    | -13.3%           | <0.001* |
| SELE          | 6035 [4054-7535]   | 3604 [2477-4478]    | -40.3%           | <0.001* |
| PI3           | 5.4 [4.5-7.3]      | 5.3 [4.2-7.0]       | -1.9%            | 0.019*  |
| EPHB4         | 51.9 [47.4-59.9]   | 52.5 [47.2-59.8]    | 1.2%             | 0.22    |
| EGFR          | 11.3 [10.5-12.5]   | 10.0 [9.1-10.7]     | -11.5%           | <0.001* |
| Ep-CAM        | 56.6 [28.4-94.1]   | 107.3 [58.5-204.4]  | 89.6%            | <0.001* |
| FABP4         | 98.3 [60.9-135.9]  | 68.8 [47.9-85.2]    | -30.0%           | <0.001* |
| Gal-3         | 11.5 [10.4-12.9]   | 11.2 [10.1-12.6]    | -2.6%            | 0.35    |
| Gal-4         | 15.6 [12.7-19.8]   | 19.6 [14.9-25.9]    | 25.6%            | 0.002*  |
| GRN           | 57.1 [49.8-66.1]   | 57.2 [47.5-63.8]    | 0.2%             | 0.003*  |
| GDF-15        | 47.6 [38.5-59.7]   | 51.8 [40.1-63.1]    | 8.8%             | 0.048   |
| IGFBP-1       | 13.4 [6.6-23.9]    | 36.8 [20.8-52.4]    | 174.6%           | <0.001* |
| IGFBP-2       | 450 [338-641]      | 188 [136-286]       | -58.2%           | <0.001* |
| IGFBP-7       | 270 [236-304]      | 252 [222-294]       | -6.7%            | 0.09    |
| ITGB2         | 188 [136-286]      | 450 [337-641]       | 139.4%           | <0.001* |
| ICAM-2        | 53.8 [44.8-61.3]   | 58.1 [48.3-68.4]    | 9.0%             | <0.001* |
| IL-1RT1       | 93.2 [79.8-105.7]  | 96.3 [88.7-109.8]   | 3.3%             | <0.001* |
| IL-1RT2       | 48.6 [40.8-54.5]   | 40.3 [33.3-46.6]    | -17.1%           | <0.001* |
| IL-17RA       | 22.1 [18.1-28.9]   | 19.6 [16.3-25.2]    | -11.3%           | <0.001* |
| IL-18BP       | 71.1 [63.9-81.4]   | 70.4 [60.5-79.9]    | -1.0%            | 0.007*  |
| IL2-RA        | 15.0 [11.9-17.7]   | 13.3 [11.8-17.2]    | -11.3%           | <0.001* |
| IL-6RA        | 5075 [4208-6023]   | 4850 [4003-5553]    | -4.4%            | <0.001* |
| JAM-A         | 110.2 [74.7-161.9] | 84.0 [51.3-127.5]   | -23.8%           | <0.001* |
| KLK6          | 5.9 [5.1-6.8]      | 6.2 [5.2-6.9]       | 5.1%             | <0.001* |
| LDL receptor  | 25.4 [19.5-32.9]   | 14.9 [11.6-19.8]    | -41.3%           | <0.001* |
| LTBR          | 17.0 [15.3-19.2]   | 17.0 [14.8-18.8]    | 0%               | 0.35    |
| MEPE          | 71.2 [60.3-88.7]   | 73.4 [62.3-90.2]    | 3.1%             | 0.025*  |
| MMP-2         | 17.4 [14.9-19.5]   | 18.8 [16.3-22.4]    | 8.0%             | <0.001* |
| MMP-3         | 194 [154-278]      | 177 [132-234]       | -8.8%            | 0.22    |
| MMP-9         | 58.8 [40.7-89.8]   | 49.2 [33.2-61.6]    | -16.3%           | <0.001* |
| TIMP4         | 13.2 [11.4-15.2]   | 14.2 [11.8-17.0]    | 7.6%             | 0.047   |
| MCP-1         | 17.4 [14.8-21.1]   | 16.2 [13.3-18.9]    | -6.9%            | <0.001* |
| PRTN3         | 18.2 [14.5-21.6]   | 16.3 [13.8-18.9]    | -10.4%           | <0.001* |
| MPO           | 11.2 [9.5-13.5]    | 10.0 [8.6-12.4]     | -10.7%           | <0.001* |
| MB            | 212 [170-292]      | 163 [130-213]       | -23.1%           | 0.003*  |

|                       |                     |                     |        |                   |
|-----------------------|---------------------|---------------------|--------|-------------------|
| <b>NT-proBNP</b>      | 11.1 [6.6-16.6]     | 17.5 [11.2-24.6]    | 57.7%  | <b>0.010*</b>     |
| <b>Notch 3</b>        | 50.2 [41.2-59.1]    | 52.6 [42.5-63.3]    | 4.9%   | <b>0.021*</b>     |
| <b>OPN</b>            | 198 [157-248]       | 315 [257-400]       | 59.1%  | <b>&lt;0.001*</b> |
| <b>OPG</b>            | 16.7 [13.6-18.35]   | 15.7 [14.1-18.3]    | -6.0%  | 0.12              |
| <b>SELP</b>           | 2615 [1877-3616]    | 1841 [1210-2617]    | -29.6% | <b>&lt;0.001*</b> |
| <b>PON3</b>           | 107 [77-156]        | 139 [106-159]       | 29.9%  | <b>&lt;0.001*</b> |
| <b>PGLYRP1</b>        | 188 [154-228]       | 178 [148-204]       | -5.3%  | <b>&lt;0.001*</b> |
| <b>PLC</b>            | 299 [266-337]       | 284 [249-309]       | -5.0%  | <b>&lt;0.001*</b> |
| <b>PAI</b>            | 77.6 [53.7-109.1]   | 44.5 [31.0-64.9]    | -42.7% | <b>&lt;0.001*</b> |
| <b>PECAM-1</b>        | 70.4 [52.6-92.3]    | 54.8 [39.6-75.0]    | -22.2% | <b>&lt;0.001*</b> |
| <b>GP6</b>            | 17.4 [11.5-23.2]    | 13.2 [8.7-18.4]     | -24.1% | <b>&lt;0.001*</b> |
| <b>PDGF subunit A</b> | 25.2 [18.7-36.1]    | 17.6 [13.2-25.9]    | -30.2% | <b>&lt;0.001*</b> |
| <b>PCSK9</b>          | 8.9 [7.4-10.5]      | 7.7 [7.0-8.8]       | -13.5% | <b>&lt;0.001*</b> |
| <b>DLK-1</b>          | 53.8 [36.5-66.9]    | 78.7 [57.7-97.1]    | 45.3%  | <b>&lt;0.001*</b> |
| <b>PSP-D</b>          | 7.0 [5.4-10.3]      | 6.5 [4.5-8.1]       | -7.1%  | <b>0.007*</b>     |
| <b>RETN</b>           | 82.0 [68.5-100.8]   | 83.0 [62.6-97.2]    | 1.2%   | <b>0.037*</b>     |
| <b>RARRES2</b>        | 4461 [3888-4950]    | 3489 [3100-4032]    | -21.8% | <b>&lt;0.001*</b> |
| <b>CD163</b>          | 299.4 [249.6-389.6] | 220.5 [175.9-301.6] | -26.4% | <b>&lt;0.001*</b> |
| <b>SCGB3A2</b>        | 5.4 [4.1-7.8]       | 5.9 [4.8-8.7]       | 9.3%   | <b>0.009*</b>     |
| <b>SPON1</b>          | 4.5 [4.1-5.1]       | 4.9 [4.2-5.5]       | 8.9%   | <b>0.024*</b>     |
| <b>ST2</b>            | 23.3 [18.3-29.3]    | 24.2 [18.1-30.3]    | 3.9%   | 0.45              |
| <b>TR-AP</b>          | 15.3 [13.2-17.7]    | 14.7 [12.8-16.8]    | -3.9%  | <b>0.009*</b>     |
| <b>TFPI</b>           | 736 [654-847]       | 674 [578-780]       | -12.1% | <b>&lt;0.001*</b> |
| <b>t-PA</b>           | 111 [84-155]        | 74 [61-100]         | -33.3% | <b>&lt;0.001*</b> |
| <b>TR</b>             | 59.5 [44.1-83.9]    | 45.2 [37.8-56.6]    | -24.0% | <b>&lt;0.001*</b> |
| <b>TFF3</b>           | 36.9 [31.7-46.0]    | 43.5 [38.0-55.0]    | 17.9%  | 0.67              |
| <b>TLT-2</b>          | 61.9 [52.7-73.6]    | 52.8 [43.8-62.3]    | -14.7% | <b>&lt;0.001*</b> |
| <b>TNFSF13B</b>       | 168 [142-189]       | 142 [121-159]       | -15.5% | <b>&lt;0.001*</b> |
| <b>TNF-R1</b>         | 133 [115-150]       | 122 [101-138]       | -8.3%  | <b>&lt;0.001*</b> |
| <b>TNF-R2</b>         | 66.7 [55.3-77.8]    | 61.0 [52.1-70.4]    | -8.5%  | <b>&lt;0.001*</b> |
| <b>TNFRSF10C</b>      | 155 [122-202]       | 155 [103-203]       | 0%     | <b>&lt;0.001*</b> |
| <b>TNFRSF14</b>       | 36.1 [30.7-42.1]    | 34.0 [29.8-39.4]    | -5.8%  | <b>&lt;0.001*</b> |
| <b>FAS</b>            | 76.4 [67.4-87.2]    | 71.5 [62.0-81.7]    | -6.4%  | <b>0.0013*</b>    |
| <b>AXL</b>            | 637 [553-726]       | 588 [507-676]       | -7.7%  | <b>0.012*</b>     |
| <b>SHPS-1</b>         | 15.0 [12.9-18.4]    | 15.6 [12.9-18.0]    | 4.0%   | 0.51              |
| <b>U-PAR</b>          | 48.8 [40.9-60.1]    | 45.8 [40.5-52.7]    | -6.1%  | <b>&lt;0.001*</b> |
| <b>uPA</b>            | 29.9 [26.2-34.7]    | 26.6 [21.8-31.0]    | -11.0% | <b>&lt;0.001*</b> |
| <b>vWF</b>            | 153 [108-216]       | 149 [122-196]       | -2.6%  | 0.07              |

Values represent median [Q1-Q3], all units are NPX.

Relative changes of all biomarkers from pre- to one year post-bariatric surgery were calculated by subtracting the median value of biomarkers pre-surgery from the value of the biomarkers post-surgery, and dividing the obtained difference by the median value of the biomarkers pre-surgery.

P-values displayed for changes in biomarker levels between pre- and post-surgery were obtained by univariable linear mixed modeling.

\* Significant after Benjamini–Hochberg correction.

**Supplementary Table S3: Biomarkers selected by spls-DA analysis**

|              |
|--------------|
| TLT2         |
| GP6          |
| CASP3        |
| SELP         |
| JAMA         |
| PECAM1       |
| PDGFsubunitA |
